# Supplementary material for: Characterization of the Upper Respiratory Tract Microbiomes of Patients with Pandemic H1N1 Influenza
Source: PLoS One. 2013 Jul 2;8(7):e69559. doi: 10.1371/journal.pone.0069559 (PMC3699515; doi:10.1371/journal.pone.0069559)
Supplement: Table S3 — Frequencies of nearest neighbor "species" in all samples. (XLSX) [file pone.0069559.s003.xlsx]

## Sheet: Table S3
Table S3 - Frequency of reads from each nearest neighbour "species" in each sample, with phylum lineage and summary proportions. Nearest neighbours with less than 80% identity to their best database match are listed as an unknown organism within the phylum.
Closest cpnDB database match	Phylum	Genus species	Total # reads for "species"	Proportion of dataset	# samples (n=65) containing "species"	flu01	flu02	flu03	flu04	flu05	flu06	flu07	flu08	flu09	flu10	flu11	flu12	flu13	flu14	flu15	flu16	flu17	flu18	flu19	flu20	flu21	flu22	flu23	flu24	flu25	flu26	flu27	flu28	flu29	flu30	flu31	flu32	flu33	flu34	flu35	flu37	flu38	flu39	flu40	flu41	flu42	flu43	flu44	flu45
v3131 3372 Corynebacterium pseudodiphtheriticum A7-60	Actinobacteria	Corynebacterium pseudodiphtheriticum	35087	12.9815	65	1	87	9	499	62	1124	64	34	3	1929	8	26	26	1	46	3	3	8	25	1754	7	1866	22	33	54	159	10	4	11	53	13	44	2	44	30	13	160	39	105	121	326	18	368	1220
b12837 NC_012791 Variovorax paradoxus S110	Proteobacteria	Variovorax paradoxus	7125	2.63612	65	19	199	104	609	62	207	43	244	3	12	60	42	761	16	128	93	24	5	52	63	44	329	31	42	55	31	62	408	19	65	5	31	10	4	71	15	176	65	35	55	67	78	123	362
b19630 JF745942 Tetrasphaera australiensis DSM 12890	Actinobacteria	Unknown Actinobacteria 2	4374	1.6183	65	2	8	8	4	18	21	8	29	5	4	7	2	27	1	8	5	3	5	11	24	3	26	30	108	4	1	10	1	5	21	2	600	23	26	7	12	16	20	69	2591	5	286	35	5
b22702 AMYL01000007 Staphylococcus aureus subsp. aureus DSM 20231	Firmicutes	Staphylococcus aureus	51575	19.0818	61	1	7	21	3	8	0	8	2	143	4	2	1	5	0	12	5	3	8	3	14340	15	12	18	9	42	6	8	2	6	4	0	3	1	2	5	3	13	17	10	55	13	2	0	13
b137 M22382 Homo sapiens mitochondrion	Human	Homo sapiens	465	0.172041	57	0	6	5	8	8	18	5	6	2	3	5	8	8	2	9	2	0	0	0	13	8	10	10	8	17	1	1	2	6	21	3	7	4	3	0	16	22	4	21	9	10	5	9	4
b14626 NZ_ACYH01000027 Treponema vincentii ATCC 35580	Other bacteria	Treponema vincentii	250	0.0924953	56	1	1	8	2	7	18	6	1	1	1	4	0	8	0	2	0	0	4	3	10	1	6	5	3	4	2	1	12	2	4	0	3	0	0	0	4	3	10	4	5	2	1	5	4
b19731 ACUE01000006 Propionibacterium sp. 5_U_42AFAA	Actinobacteria	Propionibacterium sp.	3050	1.12844	53	21	31	21	172	1	35	0	0	1	7	69	0	114	0	13	0	0	0	0	13	5	1	37	50	3	0	36	79	18	6	0	430	6	12	1	9	2	11	16	881	24	165	233	10
b824 AF245666 Enterococcus hirae ATCC 8043	Firmicutes	Enterococcus hirae	5879	2.17512	52	0	0	0	0	7	7	0	4	0	0	9	32	570	1	2	0	7	0	0	27	7	11	129	45	2	13	9	125	47	140	0	8	47	3	4	19	2195	3	206	0	46	2	28	1069
b1124 AF352805 Streptococcus pneumoniae ATCC 33400	Firmicutes	Streptococcus pneumoniae	39450	14.5958	51	4	48	2	12	4	2511	25	2841	0	6	0	7	24	77	118	1	1	609	2784	1448	7392	252	6	6	1	2	2	85	1	859	1	0	11	1	0	0	22	0	1	2	0	0	0	0
b22579 NZ_ANSG01000019 Neisseria meningitidis 77221	Proteobacteria	Neisseria meningitidis	33166	12.2708	43	0	4	1	1	0	382	1	5	1	6	4	6	1	0	9	0	0	154	0	22	2	0	1	4	10	1	0	0	0	5	0	0	0	0	0	3	0	6	2	1	3	0	2	2
b3420 AY123661 Pseudomonas fluorescens ATCC 13525	Proteobacteria	Pseudomonas fluorescens	3396	1.25646	41	0	18	0	138	6	5	1	5	0	0	2	1	1023	2	1	126	38	1	52	2	15	11	13	13	0	1	0	0	0	9	0	0	0	0	0	0	0	0	5	2	1	0	11	0
b20442 NC_016887 Nocardia cyriacigeorgica GUH-2	Actinobacteria	Unknown Actinobacteria 1	8960	3.31503	39	0	6	3	6	0	415	181	3	5	292	0	0	6	0	3	0	0	0	1	57	0	515	0	1	8	21	0	0	0	0	0	0	0	32	8	1	53	0	25	21	32	0	119	2
b13661 ACGD01000005 Corynebacterium accolens ATCC 49725	Actinobacteria	Corynebacterium accolens	1045	0.38663	36	0	2	0	5	66	1	0	0	0	2	1	0	0	0	0	0	3	0	0	0	0	2	0	8	6	15	25	26	0	0	0	88	2	1	29	19	11	0	38	72	1	309	19	5
b17979 AEDX01000013 Streptococcus mitis NCTC 12261	Firmicutes	Streptococcus mitis	1866	0.690385	31	1271	1	1	20	0	101	0	31	0	4	0	2	5	5	52	0	0	152	0	1	2	0	0	0	0	2	0	9	0	0	0	1	0	0	0	0	43	0	0	1	0	6	0	0
b9562 CP000699 Sphingomonas wittichii RW1	Proteobacteria	Sphingomonas wittichii	189	0.0699264	31	1	21	0	30	3	4	0	1	0	1	0	1	13	0	0	0	11	0	0	0	1	4	4	0	0	0	2	2	0	26	0	0	0	1	3	4	0	4	3	6	1	0	0	0
b14483 NZ_ACVP01000003 Corynebacterium tuberculostearicum SK141	Actinobacteria	Corynebacterium tuberculostearicum	1499	0.554602	30	0	18	0	0	25	7	0	0	0	8	13	0	0	0	0	0	0	0	0	10	0	0	2	5	4	4	58	141	1	0	0	827	9	1	0	3	0	0	46	155	0	17	36	0
b10197 EF173658 Staphylococcus epidermidis ATCC 14990	Firmicutes	Staphylococcus epidermidis	3953	1.46254	29	0	0	0	0	0	0	0	0	0	0	0	0	0	0	1	1	0	0	0	8	0	0	0	0	1	0	2	2	0	0	1	607	11	3	0	0	0	1	1	10	0	2	0	1
b7762 CP000494 Bradyrhizobium sp. BTAi1	Proteobacteria	Bradyrhizobium sp.	676	0.250107	29	13	17	43	86	51	52	3	22	13	28	121	84	12	1	6	5	3	0	1	0	0	0	0	0	0	0	0	3	0	5	0	0	2	0	2	0	0	17	1	0	0	0	0	0
b22058 ANXK01000015 Escherichia coli KTE229	Proteobacteria	Escherichia coli	10267	3.7986	27	0	63	8	0	6	0	0	0	0	0	1	0	0	2	0	0	0	1	0	0	0	0	13	0	0	0	0	0	0	3	0	0	0	0	0	0	0	0	0	1	24	0	66	43
b7335 AY837570 Prevotella melaninogenica ATCC 25845D	Bacteroidetes	Prevotella melaninogenica	8082	2.99019	27	2	0	0	0	0	1393	0	7	0	0	0	0	0	0	0	0	0	5718	1	7	1	1	1	1	5	3	0	3	0	1	0	0	78	1	1	0	0	0	3	0	0	0	0	0
b3428 AY123718 Rothia mucilaginosa ATCC 25296	Actinobacteria	Rothia mucilaginosa	1365	0.505024	24	0	0	0	0	0	69	0	0	1	12	0	0	0	0	18	0	0	84	0	0	0	0	0	0	7	2	0	24	0	0	0	8	0	0	0	0	14	0	0	0	110	0	0	0
v1628 3280 Dolosigranulum pigrum z1901	Firmicutes	Dolosigranulum pigrum	1328	0.491335	24	0	4	0	0	0	28	0	0	0	16	3	0	0	0	0	0	0	0	0	0	1	0	0	0	36	40	0	0	0	11	206	1	0	0	0	0	12	0	4	3	0	1	0	655
b3406 AY123694 Moraxella lincolnii ATCC 51388	Proteobacteria	Moraxella lincolnii	10782	3.98914	21	0	1	0	0	1	0	0	0	0	0	0	0	21	2523	0	21	0	2	0	0	2	11	8	41	5899	0	0	1	0	0	321	0	1	2	0	0	0	0	0	0	1	0	0	0
b10882 NZ_ABBX01000122 Candidate division TM7 sp. single-cell isolate TM7c	Other bacteria	Unknown Bacteria 1	6021	2.22766	20	1	0	0	0	0	7	0	0	0	5	0	62	0	0	0	0	1	5841	4	1	0	1	0	0	3	3	2	2	0	1	0	0	41	1	0	0	0	0	0	0	0	0	17	0
b18648 NZ_AEWU01000021 Haemophilus parainfluenzae ATCC 33392	Proteobacteria	Haemophilus parainfluenzae	1553	0.574581	18	0	0	0	2	0	1438	0	0	0	0	0	0	4	3	2	0	0	9	0	0	0	11	0	0	0	0	0	4	1	2	0	0	0	0	0	0	0	0	0	1	0	0	0	0
b810 AB039274 Propionibacterium granulosum	Actinobacteria	Propionibacterium granulosum	851	0.314854	18	0	0	0	681	1	0	1	1	0	0	0	0	1	0	0	0	0	0	0	0	0	0	0	0	0	0	1	0	0	0	0	53	1	3	1	3	0	0	14	24	0	28	33	0
b19673 AGAZ01000076 Neisseria wadsworthii 9715	Proteobacteria	Unknown Proteobacteria	302	0.111734	17	0	0	0	16	1	4	4	17	0	0	0	1	2	0	2	0	0	0	0	0	0	0	0	0	0	0	0	0	0	0	0	0	0	0	0	0	12	0	0	0	0	0	0	0
b19326 AFQE01000113 Neisseria macacae ATCC 33926	Proteobacteria	Neisseria macacae	177	0.0654867	17	0	1	0	0	0	60	0	0	0	7	0	0	0	1	1	0	0	6	0	12	0	0	0	0	0	0	0	0	0	10	0	9	0	0	0	0	0	0	0	0	25	0	0	0
v5155 3881 Streptococcus parasanguinis ATCC 15912	Firmicutes	Streptococcus parasanguinis	4029	1.49065	15	1	0	0	0	0	67	0	0	0	0	0	0	1	1	21	0	0	1	0	0	0	0	0	0	0	0	0	0	0	0	0	0	0	0	0	0	0	0	0	0	0	0	0	0
b3407 AY123671 Moraxella nonliquefaciens ATCC 19975	Proteobacteria	Moraxella nonliquefaciens	232	0.0858356	15	0	0	0	0	0	20	0	1	0	64	0	0	0	0	5	0	0	0	0	7	0	19	0	2	0	16	0	25	0	1	0	0	0	0	0	0	0	0	0	0	0	0	0	2
b3427 AY123717 Ralstonia pickettii ATCC 27511	Proteobacteria	Ralstonia pickettii	77	0.0284886	14	0	0	0	0	1	0	0	11	0	0	0	0	19	0	0	4	0	0	0	0	0	0	0	0	0	5	0	4	0	0	0	0	0	0	0	0	4	0	0	0	0	0	0	2
b14376 CP002395 Asticcacaulis excentricus CB 48	Proteobacteria	Unknown Proteobacteria	62	0.0229388	14	0	0	0	2	0	0	0	4	0	15	0	0	10	0	0	5	0	2	1	0	0	8	0	0	0	0	0	0	0	0	0	0	0	0	0	0	5	2	0	0	0	2	0	0
b21615 NZ_AJJP01000008 Pseudomonas sp. HYS	Proteobacteria	Pseudomonas sp.	123	0.0455077	13	0	0	0	1	0	0	0	0	0	14	0	0	17	0	0	2	2	0	0	3	0	0	0	1	0	0	0	0	0	0	0	0	0	0	0	0	0	0	0	0	0	0	0	0
b821 AF245684 Enterococcus faecalis ATCC 19433	Firmicutes	Enterococcus faecalis	101	0.0373681	13	0	0	0	0	0	0	0	0	0	0	0	0	5	0	0	0	0	0	0	0	0	0	4	2	0	0	0	17	0	0	0	0	0	0	0	0	41	9	2	0	0	0	0	6
b20737 NZ_AHIP01000014 Pseudomonas extremaustralis 14-3	Proteobacteria	Pseudomonas extremaustralis	3025	1.11919	12	0	0	0	0	9	0	0	0	0	0	0	0	0	0	0	0	0	0	0	0	2	0	0	0	0	0	0	0	0	0	0	0	0	0	5	0	0	0	0	0	0	0	0	0
b18094 AECS01000012 Megasphaera micronuciformis F0359	Firmicutes	Megasphaera micronuciformis	2077	0.768451	12	0	0	0	0	0	20	0	0	0	0	0	2	0	0	0	0	0	218	0	0	0	0	0	0	0	1	0	0	0	0	0	0	0	0	0	0	0	0	0	0	0	0	0	0
b2558 NC_003902 Xanthomonas campestris pv. campestris ATCC 33913	Proteobacteria	Xanthomonas campestris	89	0.0329283	12	0	0	0	4	0	0	1	0	0	0	0	0	35	1	29	11	2	0	2	0	0	0	0	0	0	0	0	1	0	0	0	0	0	0	0	0	0	0	0	0	0	0	0	0
b17646 AB547577 Porphyromonas catoniae JCM 13863	Bacteroidetes	Unknown Bacteroidetes	3725	1.37818	11	0	0	0	0	0	3443	0	13	0	1	0	0	14	2	33	0	0	200	0	0	0	0	0	0	0	0	0	0	0	2	0	0	0	0	0	0	0	0	0	0	0	0	0	0
b12427 EU790575 Pseudomonas pictorum ATCC 23328	Proteobacteria	Pseudomonas pictorum	942	0.348522	11	0	0	6	0	0	0	0	0	0	0	0	0	0	0	0	0	0	0	0	0	0	0	0	0	0	0	0	0	0	0	0	0	0	0	0	0	0	0	0	0	0	0	0	0
b11988 AP009152 Kocuria rhizophila DC2201	Actinobacteria	Unknown Actinobacteria	136	0.0503174	11	0	0	0	0	0	15	0	0	0	16	0	0	0	0	0	0	0	1	0	0	0	0	0	0	0	0	2	0	0	0	0	0	0	2	0	0	0	0	0	0	6	3	0	0
b16599 ADMV01000002 Streptococcus oralis ATCC 35037	Firmicutes	Streptococcus oralis	77	0.0284886	11	0	0	0	0	0	4	0	0	0	4	0	0	0	0	0	0	0	1	0	3	0	0	0	0	0	0	0	0	0	0	0	0	0	0	0	0	1	0	0	0	2	1	0	0
b18414 ACRC01000387 Achromobacter xylosoxidans C54	Proteobacteria	Achromobacter xylosoxidans	54	0.019979	11	0	0	0	1	0	2	0	0	0	0	0	0	7	0	0	0	2	0	0	0	0	0	0	0	0	0	0	0	0	13	0	0	0	0	0	0	2	0	0	0	0	0	0	0
b10275 EF685248 Acidovorax sp. JS42	Proteobacteria	Acidovorax sp.	42	0.0155392	11	0	0	0	0	13	3	0	0	0	0	0	0	9	0	0	3	0	0	0	0	0	0	0	0	3	0	0	0	0	2	0	0	0	0	0	0	0	0	0	0	0	0	0	1
b10795 NC_011004 Rhodopseudomonas palustris TIE-1	Proteobacteria	Rhodopseudomonas palustris	32	0.0118394	11	0	0	3	17	0	0	0	0	1	1	0	0	0	0	0	0	3	1	0	0	0	0	0	0	0	0	1	1	0	0	1	0	0	1	0	0	0	0	0	0	0	0	0	0
b3459 AB071388 Campylobacter rectus ATCC 33238	Proteobacteria	Campylobacter rectus	628	0.232348	10	0	0	0	0	0	79	0	0	0	0	0	0	1	0	0	0	0	452	1	0	3	0	0	0	1	1	0	0	0	0	0	0	0	0	0	0	0	0	0	0	0	0	0	0
b17598 AB547625 Prevotella oris JCM 8540	Bacteroidetes	Prevotella oris	424	0.156872	10	0	0	0	0	0	1	0	0	0	0	0	0	0	0	0	0	0	385	1	0	0	0	0	0	0	0	0	0	0	0	0	0	1	0	0	0	0	0	0	0	0	0	0	0
b6849 AY691288 Prevotella tannerae ATCC 51259	Bacteroidetes	Prevotella tannerae	373	0.138003	10	1	0	0	0	0	21	0	0	0	0	0	0	0	0	0	0	0	331	0	0	0	1	0	0	0	2	0	0	0	0	0	0	1	1	0	0	5	0	0	0	0	0	0	0
b19941 ACZK01000037 Prevotella sp. oral taxon 302 str. F0323	Bacteroidetes	Unknown Bacteroidetes	185	0.0684465	10	0	0	0	0	0	24	0	1	0	2	0	0	0	0	0	0	0	9	0	0	0	0	0	0	0	0	0	90	1	0	0	0	0	0	0	0	1	0	0	0	0	0	0	0
b233 AF053572 Staphylococcus hominis ATCC 27844	Firmicutes	Staphylococcus hominis	82	0.0303385	10	0	0	0	21	0	0	0	0	0	0	0	0	27	0	0	0	0	0	0	2	0	1	0	0	0	0	0	0	0	0	0	7	0	0	0	0	0	0	0	0	0	0	0	0
b3440 AY123738 Streptococcus gordonii ATCC 10558	Firmicutes	Streptococcus gordonii	36	0.0133193	10	0	0	0	0	0	0	0	0	0	0	0	0	0	0	0	0	0	3	6	3	11	0	0	0	0	0	0	0	0	3	0	0	0	0	0	0	0	0	0	0	0	0	0	0
b19940 ACZM01000015 Selenomonas infelix ATCC 43532	Firmicutes	Selenomonas infelix	451	0.166862	9	0	0	0	0	0	112	0	0	0	0	0	0	5	0	0	0	0	95	0	0	0	0	0	0	0	0	0	0	0	0	0	0	1	1	0	0	0	0	0	0	0	0	0	0
b3386 AY123673 Gardnerella vaginalis ATCC 14018	Actinobacteria	Gardnerella vaginalis Group C	220	0.0813959	9	0	0	0	16	0	0	0	0	0	0	0	0	0	0	0	0	0	0	0	3	0	0	0	0	0	0	0	0	0	16	0	0	0	0	0	0	0	0	0	0	0	0	0	19
b10722 XM_001731267 Malassezia globosa CBS 7966	Fungi	Malassezia globosa	81	0.0299685	9	1	0	0	0	0	0	0	0	0	0	0	0	2	0	0	0	0	0	2	0	0	0	0	0	0	0	9	0	0	0	0	58	0	2	0	0	0	0	0	1	0	0	0	0
v5162 3891 Streptococcus sanguinis ATCC 10556	Firmicutes	Streptococcus sanguinis	47	0.0173891	9	0	0	0	0	0	18	0	0	0	0	0	1	0	0	10	0	0	10	0	0	0	0	0	0	0	0	0	0	0	1	0	0	0	0	0	0	0	0	0	0	0	0	0	0
b19706 NZ_AGBA01000013 Propionibacterium avidum ATCC 25577	Actinobacteria	Propionibacterium avidum	26	0.00961951	9	0	0	0	1	0	0	0	0	1	0	0	0	0	0	0	0	0	0	0	0	0	0	1	0	0	0	9	1	0	0	0	0	0	0	0	0	0	3	0	1	0	6	0	0
b21692 XM_003990995 Felis catus Cinnamon	Human	Felis catus	14	0.00517974	9	0	0	0	0	1	0	0	0	0	0	0	0	0	0	1	0	0	0	0	0	0	0	0	0	0	0	0	0	0	0	0	0	0	0	0	0	0	2	0	0	0	1	3	2
v5403 4143 Streptococcus pseudopneumoniae ATCC BAA-960, CDC SS-1757	Firmicutes	Streptococcus pseudopneumoniae	622	0.230128	8	0	0	0	0	0	307	0	10	0	8	0	0	0	0	30	0	0	117	0	0	0	0	0	0	0	1	0	0	0	1	0	0	0	0	0	0	0	0	0	0	0	0	0	0
b18495 AECQ01000028 Solobacterium moorei F0204	Firmicutes	Solobacterium moorei	495	0.183141	8	0	0	0	0	0	2	0	0	0	0	0	0	0	0	0	0	0	478	1	0	0	2	0	0	1	0	0	0	0	0	0	0	0	0	0	0	0	0	0	0	1	0	0	0
b17622 AB547601 Prevotella denticola JCM 13449	Bacteroidetes	Prevotella denticola	368	0.136153	8	0	0	0	0	0	0	0	3	0	0	0	0	0	0	0	0	0	148	0	0	0	0	0	0	0	0	0	1	0	0	0	0	0	0	0	0	0	0	0	0	0	0	0	0
b3404 AY123721 Moraxella catarrhalis ATCC 25238	Proteobacteria	Moraxella catarrhalis	117	0.0432878	8	0	1	0	0	0	0	0	0	0	0	0	76	0	0	0	0	0	0	0	0	0	0	0	18	0	1	0	0	0	1	0	0	0	0	0	0	0	0	0	0	0	0	0	3
b14062 NC_012704 Corynebacterium kroppenstedtii DSM 44385	Actinobacteria	Corynebacterium kroppenstedtii	112	0.0414379	8	16	0	0	0	0	0	0	0	0	1	0	0	0	0	0	0	2	0	0	0	0	0	0	11	0	0	3	0	0	0	0	72	1	0	0	0	0	0	0	0	0	0	0	0
b3155 NC_003062 Agrobacterium tumefaciens C58 (Cereon)	Proteobacteria	Agrobacterium tumefaciens	75	0.0277486	8	0	0	0	0	0	0	0	0	0	0	0	54	0	0	0	0	0	0	0	0	1	0	0	0	0	0	0	9	0	0	0	0	0	0	0	0	0	0	0	0	0	0	1	4
b13642 ACHJ01000017 Corynebacterium lipophiloflavum DSM 44291	Actinobacteria	Corynebacterium lipophiloflavum	68	0.0251587	8	0	0	0	21	0	0	0	0	0	0	0	0	0	0	0	0	0	0	5	0	0	0	0	0	0	1	0	0	0	0	0	14	0	0	3	0	0	0	0	0	0	22	0	0
b18514 AEVD01000004 Streptococcus infantis ATCC 700779	Firmicutes	Streptococcus infantis	568	0.210149	7	0	0	0	0	0	446	0	0	0	10	0	0	0	0	0	0	0	67	0	0	0	0	2	0	0	0	0	17	0	0	0	0	0	0	0	0	0	0	0	0	0	0	0	0
b18462 AEQP01000001 Lautropia mirabilis ATCC 51599	Proteobacteria	Lautropia mirabilis	140	0.0517974	7	0	0	0	4	0	104	0	0	0	0	0	0	19	0	9	0	0	0	0	0	0	1	0	0	0	0	0	0	0	1	0	0	0	0	0	0	0	0	0	0	0	0	0	0
b19438 AFQO01000016 Haemophilus haemolyticus M19501	Proteobacteria	Haemophilus haemolyticus	103	0.0381081	7	0	0	2	0	0	35	0	1	0	0	0	0	0	0	1	0	0	0	0	0	0	0	0	0	0	0	0	0	0	61	0	0	0	0	0	0	0	0	0	0	0	0	0	0
b13539 NC_012490 Rhodococcus erythropolis PR4 NBRC 100887	Actinobacteria	Rhodococcus erythropolis	88	0.0325583	7	0	0	0	0	0	0	0	0	0	0	0	0	0	0	0	0	0	0	0	0	0	0	0	0	0	0	0	0	0	0	0	1	0	0	0	0	0	0	0	0	1	0	15	0
b22237 NZ_AMEX01000007 Veillonella atypica KON ATCC 17744	Firmicutes	Veillonella atypica	473	0.175001	6	0	0	0	0	0	17	0	0	0	0	0	2	0	0	0	0	0	437	0	0	0	0	0	0	0	0	0	0	0	0	0	0	1	0	0	0	0	0	0	0	0	0	0	0
b18121 NC_014643 Rothia dentocariosa ATCC 17931	Actinobacteria	Rothia dentocariosa	213	0.078806	6	3	0	0	0	0	77	0	0	0	0	0	0	0	0	0	0	0	0	0	0	0	0	0	0	0	0	0	0	0	0	0	7	0	0	0	0	0	0	0	0	0	0	0	0
b253 AF036322 Staphylococcus capitis subsp. capitis ATCC 27840	Firmicutes	Staphylococcus capitis	181	0.0669666	6	0	0	0	0	0	1	0	0	1	0	0	0	0	0	0	0	0	0	0	2	0	0	0	0	0	0	0	0	0	0	0	168	5	0	0	0	0	0	4	0	0	0	0	0
b6845 AY691284 Prevotella loescheii ATCC 15930	Bacteroidetes	Prevotella loescheii	153	0.0566071	6	0	0	0	0	0	0	0	0	0	8	0	1	0	1	0	0	0	0	0	0	0	0	0	0	0	0	0	0	0	0	0	0	0	0	0	0	0	0	0	0	1	0	0	0
b15348 NC_015437 Selenomonas sputigena ATCC 35185	Firmicutes	Selenomonas sputigena	114	0.0421779	6	0	0	0	0	0	0	0	2	0	0	0	0	0	0	0	0	0	12	0	0	0	0	0	0	0	0	0	0	0	0	0	0	0	0	0	0	0	0	0	0	1	0	0	0
v4186 3878 Streptococcus oligofermentans LMG 21535	Firmicutes	Streptococcus oligofermentans	35	0.0129493	6	9	0	0	0	0	1	0	1	0	0	0	0	0	0	2	0	0	1	0	0	0	0	0	0	0	0	0	0	0	0	0	0	0	0	0	0	0	0	0	0	0	0	0	0
b3373 AY123660 Brevundimonas vesicularis ATCC 11426	Proteobacteria	Brevundimonas vesicularis	22	0.00813959	6	0	0	0	0	0	0	0	0	0	0	0	0	4	0	0	0	0	0	0	0	0	0	0	0	0	0	0	0	0	1	0	0	0	0	0	0	0	0	0	0	0	1	0	0
b20965 ALOG01000016 Stenotrophomonas maltophilia Ab55555	Proteobacteria	Stenotrophomonas maltophilia	22	0.00813959	6	0	0	0	0	0	5	0	0	0	0	0	0	1	0	1	0	0	0	0	0	0	0	0	0	0	0	0	0	0	0	0	0	0	0	0	0	0	0	0	0	0	0	0	0
b155 S82593 Rhodobacter capsulatus ATCC 33303	Proteobacteria	Rhodobacter capsulatus	17	0.00628968	6	0	0	0	0	0	0	0	0	0	1	0	0	0	0	0	0	0	0	0	0	0	0	0	0	0	0	0	0	0	4	0	0	0	0	0	0	0	0	0	1	0	0	0	7
b7909 DQ059467 Campylobacter gracilis ATCC 33236	Proteobacteria	Campylobacter gracilis	422	0.156132	5	0	0	0	0	0	0	0	0	0	0	0	0	0	0	0	0	0	2	0	0	0	0	0	0	0	0	0	0	0	0	0	0	0	0	0	0	0	0	0	0	0	0	0	0
b6808 AY691247 Corynebacterium ammoniagenes ATCC 6871	Actinobacteria	Corynebacterium ammoniagenes	158	0.058457	5	0	0	0	0	0	0	0	0	0	0	0	0	0	0	0	0	0	0	0	1	0	0	0	86	0	0	0	0	0	0	0	0	0	0	0	0	0	1	0	0	0	0	0	69
b414 AB008149 Raoultella ornithinolytica JCM6096	Proteobacteria	Raoultella ornithinolytica	122	0.0451377	5	0	0	0	112	0	1	3	0	0	0	0	0	0	0	0	0	0	0	0	0	0	0	0	0	0	0	0	0	0	0	0	0	0	0	0	0	0	0	0	0	0	0	0	0
b19136 NZ_AFIH01000001 Oribacterium sp. oral taxon 108 str. F0425	Firmicutes	Oribacterium sp.	110	0.0406979	5	0	0	0	0	0	42	0	0	0	0	0	0	0	0	0	0	0	45	0	0	0	0	0	0	0	0	0	0	0	2	0	0	0	0	0	0	0	0	0	0	0	0	0	0
b21101 NZ_ALOA01000014 Clostridiales bacterium OBRC5-5	Firmicutes	Clostridiales bacterium	102	0.0377381	5	0	0	0	0	0	1	0	0	0	0	0	0	0	0	4	0	0	93	0	0	0	0	0	0	0	0	0	0	0	0	0	0	0	0	0	0	0	0	0	0	0	0	0	0
b6806 AY691245 Corynebacterium amycolatum ATCC 49368	Actinobacteria	Corynebacterium amycolatum	64	0.0236788	5	0	0	0	0	0	0	0	0	0	0	0	0	0	0	0	0	0	0	0	0	0	0	0	0	0	0	1	58	0	0	0	3	0	0	0	0	0	0	0	1	0	1	0	0
b17532 NC_015673 Corynebacterium resistens DSM 45100	Actinobacteria	Corynebacterium resistens	36	0.0133193	5	0	0	0	0	0	0	0	0	0	0	0	0	0	0	0	0	0	0	0	0	0	0	0	0	0	1	0	0	0	0	0	12	1	0	0	0	0	0	0	0	0	0	0	0
b7450 AY562570 Lactobacillus crispatus CECT4840	Firmicutes	Lactobacillus crispatus	35	0.0129493	5	0	0	0	0	0	0	0	0	0	0	0	24	0	0	0	0	0	0	0	0	0	0	0	0	0	0	0	0	3	2	0	0	0	0	0	0	0	0	0	0	0	1	0	0
b18613 CP002379 Arthrobacter phenanthrenivorans Sphe3	Actinobacteria	Arthrobacter phenanthrenivorans	33	0.0122094	5	0	0	0	8	0	0	0	0	0	0	0	0	0	0	0	0	0	0	0	0	0	0	0	0	0	0	0	0	0	1	0	6	0	0	0	0	0	0	0	0	0	0	0	0
b408 AB008142 Enterobacter agglomerans JCM1236	Proteobacteria	Enterobacter agglomerans	13	0.00480976	5	0	0	0	0	0	0	0	0	0	1	0	0	0	0	0	0	0	0	0	0	0	0	0	0	0	0	0	0	0	0	0	0	0	0	0	0	0	0	1	0	0	0	0	0
b6850 AY691289 Prevotella veroralis ATCC 33779	Bacteroidetes	Prevotella veroralis	593	0.219399	4	0	0	0	0	0	30	0	0	0	0	0	0	0	0	0	0	0	558	0	0	0	0	0	0	0	0	0	0	0	0	0	0	2	0	0	0	0	0	0	0	0	0	0	0
b21019 NZ_AGWQ01000004 Actinomyces turicensis ACS-279-V-Col4	Actinobacteria	Actinomyces turicensis	309	0.114324	4	0	0	0	0	0	254	0	0	0	0	0	0	0	0	1	0	0	46	0	0	0	0	0	0	0	0	0	0	0	0	0	0	0	0	0	0	0	0	0	0	0	0	0	0
b13606 NC_013203 Atopobium parvulum DSM 20469	Actinobacteria	Atopobium parvulum	294	0.108774	4	0	0	0	0	0	6	0	0	0	0	0	0	0	0	0	0	0	220	0	0	0	0	0	0	0	0	0	0	0	0	0	0	0	0	0	0	0	0	0	0	0	0	0	0
b18460 AEQR01000002 Streptococcus australis ATCC 700641	Firmicutes	Streptococcus australis	245	0.0906454	4	0	0	0	0	0	147	0	0	0	0	0	0	3	0	0	0	0	93	0	0	0	0	0	0	0	0	0	0	0	0	0	0	0	0	0	0	0	0	0	0	0	0	0	0
b12773 NZ_ABYI01000063 Clostridium hylemonae DSM 15053	Firmicutes	Unknown Firmicutes	126	0.0466176	4	0	0	0	0	0	0	0	0	0	0	0	0	0	0	0	0	0	0	0	0	0	0	0	0	0	0	0	0	0	0	0	0	0	2	0	0	0	0	0	0	0	0	0	0
b15920 CP001849 Gardnerella vaginalis 409-05 NULL	Actinobacteria	Unknown Actinobacteria	99	0.0366281	4	0	0	0	0	0	0	0	0	0	0	0	0	0	0	0	0	0	0	0	0	0	0	0	0	0	0	0	0	0	0	0	2	0	0	0	0	0	0	0	0	0	0	0	0
b20192 ACRN01000011 Actinomyces graevenitzii C83	Actinobacteria	Actinomyces graevenitzii	97	0.0358882	4	0	0	0	0	0	0	0	0	0	0	0	16	0	0	0	0	0	78	0	0	0	0	0	0	0	0	0	0	0	0	0	0	1	0	0	0	0	0	0	0	0	0	0	0
b19875 AP012206 Bradyrhizobium japonicum USDA 6	Proteobacteria	Bradyrhizobium japonicum	76	0.0281186	4	0	0	24	49	0	0	0	0	0	0	0	0	0	0	0	0	1	0	0	0	0	0	0	0	0	0	0	0	0	2	0	0	0	0	0	0	0	0	0	0	0	0	0	0
b20631 NC_017672 Paenibacillus mucilaginosus K02	Firmicutes	Unknown Firmicutes	52	0.019239	4	0	0	0	0	0	0	0	0	0	0	0	0	0	0	0	0	0	0	0	0	0	0	0	0	0	0	0	0	0	0	0	1	0	0	0	0	0	0	0	0	0	0	0	0
b17604 AB547619 Prevotella nanceiensis JCM 15639	Bacteroidetes	Prevotella nanceiensis	41	0.0151692	4	0	0	0	0	0	25	0	0	0	0	0	0	0	0	0	0	0	14	0	0	0	0	0	0	0	0	0	0	0	0	0	0	0	0	0	0	0	0	0	0	0	0	0	0
b1117 AF352808 Streptococcus anginosus ATCC 33397	Firmicutes	Streptococcus anginosus	35	0.0129493	4	0	0	0	0	0	0	0	0	0	0	0	0	0	0	0	0	0	0	0	0	0	0	0	0	0	0	0	0	0	0	0	0	0	0	0	0	0	0	0	0	0	0	0	0
v5167 3897 Streptococcus vestibularis ATCC 49124	Firmicutes	Streptococcus vestibularis	32	0.0118394	4	0	0	0	0	0	0	0	0	0	0	0	0	0	0	0	0	0	5	0	0	0	0	0	0	0	0	0	0	0	0	0	0	0	0	0	0	0	0	0	0	0	0	0	0
b14162 NC_012778 Eubacterium eligens ATCC 27750	Firmicutes	Unknown Firmicutes	31	0.0114694	4	0	0	0	0	0	6	0	0	0	0	0	0	0	0	0	0	0	3	0	0	0	0	0	0	0	0	0	0	0	0	0	0	0	0	0	0	0	0	0	0	0	0	0	0
b1441 AF441382 Prevotella nigrescens ATCC 33563	Bacteroidetes	Prevotella nigrescens	31	0.0114694	4	0	0	0	0	0	0	0	0	0	0	0	0	0	0	0	0	0	13	0	0	0	0	0	0	0	0	0	0	0	0	0	0	0	0	0	0	0	0	0	0	0	1	0	0
b14108 NZ_ACIL02000003 Catonella morbi ATCC 51271	Firmicutes	Catonella morbi	20	0.00739962	4	0	0	0	0	0	0	0	0	0	2	0	0	0	0	0	0	0	0	0	2	0	0	0	0	0	0	0	0	0	0	0	0	0	0	0	0	0	0	0	0	0	0	0	0
b19090 AP012204 Microlunatus phosphovorus NM-1 NBRC 101784	Actinobacteria	Microlunatus phosphovorus	16	0.0059197	4	2	0	0	0	0	0	0	0	0	0	0	0	6	0	0	0	0	0	0	0	0	0	0	0	0	0	0	0	0	0	0	3	0	0	0	0	0	0	0	5	0	0	0	0
v12449 Mesorhizobium amorphae DSM 21831	Proteobacteria	Mesorhizobium amorphae	15	0.00554972	4	11	0	0	0	1	0	0	1	0	0	0	0	0	0	0	0	0	0	0	0	0	0	0	0	0	0	0	0	0	0	0	2	0	0	0	0	0	0	0	0	0	0	0	0
b1127 AF352807 Streptococcus salivarius subsp. salivarius ATCC 7073	Firmicutes	Streptococcus salivarius	15	0.00554972	4	0	0	0	0	0	0	0	0	0	0	0	0	0	0	2	0	0	10	0	0	0	0	0	0	1	0	0	0	0	0	0	0	0	0	0	0	0	0	0	0	0	0	0	0
b18216 NZ_AENP01000025 Peptoniphilus harei ACS-146-V-Sch2b	Firmicutes	Peptoniphilus harei	13	0.00480976	4	0	0	0	0	0	0	0	0	0	0	0	0	0	0	0	0	0	2	0	0	0	1	0	0	0	0	0	0	0	0	0	0	0	2	0	0	0	0	0	0	0	0	0	8
v3165 3356 Haemophilus segnis A6-29	Proteobacteria	Haemophilus segnis	7	0.00258987	4	0	0	0	0	0	0	0	0	0	1	0	0	0	0	0	0	0	0	0	0	0	0	0	0	0	0	0	0	0	0	0	0	0	0	0	0	0	0	0	0	0	0	0	0
b17590 AB547633 Prevotella timonensis JCM 15640	Bacteroidetes	Prevotella timonensis	7	0.00258987	4	0	0	0	0	0	0	0	0	0	0	0	0	0	0	0	0	0	0	0	4	0	0	0	0	0	0	0	0	0	0	0	0	0	0	0	0	0	0	0	0	0	0	1	0
b17817 NZ_ACSH02000004 Corynebacterium matruchotii ATCC 14266	Actinobacteria	Corynebacterium matruchotii	6	0.00221989	4	0	0	0	0	0	0	0	0	0	1	0	0	0	0	0	0	0	0	0	0	0	0	0	0	0	2	0	0	0	0	0	0	0	0	0	0	0	0	0	0	0	0	0	0
b14375 NZ_ACDZ02000011 Gemella haemolysans ATCC 10379	Firmicutes	Gemella haemolysans	6	0.00221989	4	0	0	0	0	0	0	0	0	0	0	0	0	0	0	2	0	0	1	0	0	0	0	0	0	0	0	0	1	0	0	0	0	0	0	0	0	0	0	0	0	0	0	0	0
b17592 AB547631 Prevotella shahii JCM 12083	Bacteroidetes	Prevotella shahii	410	0.151692	3	0	0	0	0	0	5	0	0	0	0	0	0	0	0	0	0	0	404	0	0	0	0	0	0	0	0	0	0	0	1	0	0	0	0	0	0	0	0	0	0	0	0	0	0
b6801 AY691240 Clostridium scindens ATCC 35704	Firmicutes	Clostridium scindens	130	0.0480976	3	0	0	0	0	0	6	0	0	0	0	0	0	0	0	0	0	0	123	0	0	0	0	0	0	0	1	0	0	0	0	0	0	0	0	0	0	0	0	0	0	0	0	0	0
b3423 AY123662 Pseudomonas pseudoalcaligenes subsp. pseudoalcaligenes ATCC 17440	Proteobacteria	Pseudomonas pseudoalcaligenes	114	0.0421779	3	0	0	0	0	0	0	0	0	0	0	0	0	1	0	0	0	0	0	0	0	0	0	0	0	0	0	0	112	0	1	0	0	0	0	0	0	0	0	0	0	0	0	0	0
b284 AF240572 Bifidobacterium dentium JCM1195	Actinobacteria	Bifidobacterium dentium	98	0.0362582	3	0	0	0	0	0	0	0	0	0	1	0	0	0	0	0	0	0	0	0	0	0	0	0	0	0	0	0	0	0	0	0	0	0	0	0	0	0	0	0	0	0	0	0	0
b17623 AB547600 Prevotella dentalis JCM 13448	Bacteroidetes	Prevotella dentalis	71	0.0262687	3	0	0	0	0	0	0	0	0	0	0	0	0	0	0	0	0	0	0	0	0	0	0	0	0	0	0	0	0	0	0	0	0	0	0	0	0	0	0	0	0	0	0	0	0
b7534 NC_007947 Methylobacillus flagellatus KT	Proteobacteria	Methylobacillus flagellatus	67	0.0247887	3	0	0	0	0	0	0	0	0	0	0	0	0	0	0	0	0	0	0	0	1	0	0	0	0	0	0	0	65	0	0	0	0	0	0	0	0	0	0	0	0	0	0	0	0
b17655 AB547552 Bacteroides coagulans JCM 12528	Bacteroidetes	Bacteroides coagulans	45	0.0166492	3	0	0	0	0	0	0	0	0	0	0	0	0	0	0	0	0	0	0	0	39	0	0	0	0	0	0	0	0	0	0	0	3	3	0	0	0	0	0	0	0	0	0	0	0
b18053 HM103913 Granulicatella para-adiacens NTUH_9631	Firmicutes	Granulicatella para-adiacens	39	0.0144293	3	0	0	0	0	0	7	0	0	0	0	0	0	0	0	0	0	0	31	0	0	0	0	0	0	0	0	0	0	0	0	0	0	0	0	0	0	0	0	0	0	0	0	0	0
b18184 AECT01000014 Staphylococcus anginosus F0211	Firmicutes	Staphylococcus anginosus	30	0.0110994	3	0	0	0	0	0	0	0	0	0	1	0	0	0	0	0	0	0	0	0	0	0	0	0	0	0	0	0	0	0	1	0	0	0	0	0	0	0	0	0	0	0	0	0	0
b1088 AF335328 Terrimonas ferruginea ATCC 13524	Bacteroidetes	Unknown Bacteroidetes	29	0.0107295	3	0	0	0	0	0	0	0	0	0	0	0	0	19	0	0	0	0	0	0	0	0	9	0	0	0	0	0	0	0	0	0	0	0	1	0	0	0	0	0	0	0	0	0	0
b17895 FM877004 Rahnella genomosp. 3 WMR126	Proteobacteria	Rahnella genomosp.	27	0.00998949	3	0	0	0	0	0	0	0	0	0	0	0	0	0	0	0	0	0	0	0	22	0	0	0	1	0	0	0	0	0	0	0	0	0	0	0	0	0	0	0	0	0	0	0	0
b17616 AB547607 Prevotella histicola JCM 15637	Bacteroidetes	Prevotella histicola	26	0.00961951	3	0	0	0	0	0	2	0	0	0	0	0	0	0	0	0	0	0	22	0	0	0	0	0	0	0	0	0	0	0	0	0	0	0	0	0	0	0	0	0	0	0	0	0	0
b13426 EU888130 Staphylococcus pettenkoferi CCM 7495	Firmicutes	Staphylococcus pettenkoferi	22	0.00813959	3	0	0	0	0	0	0	0	0	0	0	0	0	0	0	0	0	0	0	0	0	0	0	0	0	0	0	0	0	0	0	0	18	1	0	0	0	0	0	0	0	0	0	0	0
b21775 NZ_ADWW01000007 Bacillus methanolicus MGA3	Firmicutes	Bacillus methanolicus	20	0.00739962	3	0	0	0	0	0	0	0	0	0	0	0	0	0	0	0	0	0	0	0	0	0	0	0	0	0	0	0	0	0	0	0	1	0	0	0	0	0	0	0	0	0	0	0	0
b15282 NZ_ACLN01000008 Lactobacillus iners DSM 13335	Firmicutes	Lactobacillus iners	19	0.00702964	3	0	0	0	0	0	0	0	0	0	0	0	0	0	0	0	0	0	0	0	1	0	0	0	0	0	0	0	15	0	0	0	0	0	0	0	0	3	0	0	0	0	0	0	0
b16832 GG770215 Veillonella sp. 6_1_27	Firmicutes	Veillonella sp.	18	0.00665966	3	0	0	0	0	0	0	0	0	0	0	0	0	0	0	0	0	0	3	0	0	0	0	0	0	0	0	0	0	0	0	0	0	0	0	0	0	0	0	0	0	0	0	0	0
b10132 NZ_AAVN02000003 Collinsella aerofaciens ATCC 25986	Actinobacteria	Collinsella aerofaciens	17	0.00628968	3	0	0	0	0	0	0	0	0	0	0	0	0	0	0	0	0	0	0	0	0	0	0	12	0	0	0	0	0	0	0	1	4	0	0	0	0	0	0	0	0	0	0	0	0
b23358 NC_020302 Corynebacterium halotolerans YIM 70093 DSM 44683	Actinobacteria	Unknown Actinobacteria	17	0.00628968	3	0	0	0	0	0	0	0	0	0	0	0	0	0	0	13	0	0	0	0	0	0	0	0	0	0	0	0	0	0	0	0	0	0	0	0	0	0	0	3	0	0	0	0	0
b7509 NZ_AAGP01000015 Brevibacterium linens BL2	Actinobacteria	Brevibacterium linens	13	0.00480976	3	0	0	0	0	0	0	0	0	0	7	0	0	0	0	0	0	0	0	0	0	0	0	0	0	0	0	2	0	0	0	0	4	0	0	0	0	0	0	0	0	0	0	0	0
b21112 NZ_ALQB01000041 Mycobacterium fortuitum subsp. fortuitum DSM 46621	Actinobacteria	Mycobacterium fortuitum	13	0.00480976	3	0	0	0	0	0	0	0	0	0	0	0	0	0	0	0	0	0	0	0	0	0	0	0	0	0	0	0	0	0	0	0	1	0	0	0	0	0	0	0	2	0	0	0	0
b15676 CP002008 Caulobacter segnis ATCC 21756	Proteobacteria	Caulobacter segnis	12	0.00443977	3	0	0	0	0	0	0	0	0	0	0	0	0	0	0	0	0	0	0	0	0	0	0	0	0	0	0	0	0	0	0	0	0	0	0	0	0	1	0	0	0	0	0	0	0
b20821 ALCB01000038 Actinomyces sp. ICM39	Actinobacteria	Actinomyces sp.	9	0.00332983	3	0	0	0	0	0	6	0	0	0	0	0	0	0	0	2	0	0	0	0	0	0	0	0	0	0	0	0	0	0	0	0	0	0	0	0	0	0	0	0	0	0	0	0	0
b505 AY263152 Curtobacterium flaccumfaciens pv. flaccumfaciens NCPPB559	Actinobacteria	Unknown Actinobacteria	9	0.00332983	3	0	0	0	0	0	0	0	0	0	0	0	0	0	0	0	0	0	0	0	0	0	1	0	0	0	0	0	0	0	0	0	0	0	0	0	0	5	0	0	0	0	0	0	0
b7684 NC_007406 Nitrobacter winogradskyi Nb-255	Proteobacteria	Nitrobacter winogradskyi	9	0.00332983	3	0	0	0	0	0	0	0	0	0	0	0	0	2	0	0	0	0	0	0	0	0	0	1	0	0	0	0	0	0	0	0	0	0	0	0	0	0	0	0	0	0	0	0	0
b21566 NZ_AJLO01000008 Pseudomonas geniculata N1	Proteobacteria	Pseudomonas geniculata	9	0.00332983	3	0	0	0	5	0	0	0	0	0	0	0	0	0	0	0	0	0	0	0	0	0	0	0	0	0	0	0	1	0	0	0	0	0	0	0	0	0	0	0	0	0	0	0	3
b20485 AGRW01000052 Treponema saccharophilum DSM 2985	Other bacteria	Unknown Bacteria	9	0.00332983	3	0	0	0	0	0	0	0	0	0	0	0	0	0	0	0	0	0	1	0	0	0	0	0	0	0	0	0	0	0	0	0	0	0	0	0	0	0	0	0	0	0	0	0	0
b18713 AEJD00000000 Gardnerella vaginalis 101 NULL	Actinobacteria	Gardnerella vaginalis Group D	8	0.00295985	3	0	2	0	0	0	0	0	0	0	1	0	0	0	0	0	0	0	0	0	0	0	0	0	0	0	0	0	0	0	0	0	0	0	0	0	0	5	0	0	0	0	0	0	0
b3358 AY123658 Acinetobacter junii ATCC 17908	Proteobacteria	Acinetobacter junii	6	0.00221989	3	0	0	0	0	0	0	0	0	0	2	0	0	0	0	0	0	0	1	0	0	0	0	0	0	0	0	0	0	0	0	0	0	0	0	0	0	0	0	0	0	3	0	0	0
v2536 3303 Mannheimia haemolytica z93	Proteobacteria	Mannheimia haemolytica	6	0.00221989	3	0	0	0	0	0	0	0	0	0	0	0	4	0	0	0	0	0	0	0	0	0	0	0	0	0	0	0	0	0	0	0	0	0	0	0	0	0	0	0	0	0	0	0	0
b17639 AB547584 Porphyromonas gulae JCM 13865	Bacteroidetes	Porphyromonas gulae	222	0.0821358	2	0	0	0	0	0	0	0	0	0	0	0	0	0	0	0	0	0	0	0	0	0	0	0	0	0	0	0	0	0	0	0	0	0	0	0	0	0	0	0	0	0	0	0	0
b4013 NC_004663 Bacteroides thetaiotaomicron VPI-5482	Bacteroidetes	Unknown Bacteroidetes	75	0.0277486	2	0	0	0	0	0	0	0	0	0	0	0	0	0	0	0	0	0	0	0	0	0	0	0	0	0	0	0	0	0	0	0	0	0	0	0	0	0	0	0	0	0	0	0	0
b15350 NZ_ACIM02000001 Dialister invisus DSM 15470	Firmicutes	Dialister invisus	67	0.0247887	2	0	0	0	0	0	0	0	0	0	0	0	0	0	0	0	0	0	12	0	0	0	0	0	0	0	0	0	0	0	0	0	0	0	0	0	0	0	0	0	0	0	0	0	0
b20411 NZ_AGWI01000027 Eubacterium infirmum F0142	Firmicutes	Eubacterium infirmum	55	0.020349	2	0	0	0	0	0	0	0	0	0	0	0	0	0	0	0	0	0	54	0	0	0	0	1	0	0	0	0	0	0	0	0	0	0	0	0	0	0	0	0	0	0	0	0	0
b21877 AKCU01000135 Penicillium digitatum Pd1	Fungi	Penicillium digitatum	44	0.0162792	2	0	0	0	0	0	0	0	0	0	0	0	0	0	0	0	0	0	0	0	0	0	0	0	0	0	0	0	0	0	0	0	0	0	0	0	43	0	0	0	0	0	0	0	0
b20642 NZ_AJWL01000053 Hydrogenophaga sp. PBC	Proteobacteria	Hydrogenophaga sp.	33	0.0122094	2	0	0	0	0	0	0	0	0	0	0	0	0	0	0	0	0	0	0	0	0	1	0	0	0	0	0	0	32	0	0	0	0	0	0	0	0	0	0	0	0	0	0	0	0
b18638 AEWX01000014 Prevotella multiformis DSM 16608	Bacteroidetes	Prevotella multiformis	30	0.0110994	2	0	0	0	0	0	0	0	0	0	0	0	0	0	0	0	0	0	0	0	0	0	0	1	0	0	0	0	0	0	0	0	0	0	0	0	0	0	0	0	0	0	0	0	0
b18093 AECU01000014 Faecalibacterium cf. prausnitzii KLE1255	Firmicutes	Faecalibacterium cf. prausnitzii	28	0.0103595	2	0	0	0	0	0	0	0	0	0	0	0	0	0	0	0	0	0	0	0	0	0	0	23	0	0	0	0	0	0	0	0	0	0	0	5	0	0	0	0	0	0	0	0	0
b18994 AEGR01000061 Hylemonella gracilis ATCC 19624	Proteobacteria	Hylemonella gracilis	27	0.00998949	2	0	0	0	0	0	24	0	0	0	0	0	0	0	0	0	0	0	0	0	0	0	0	0	0	0	0	0	0	0	0	0	0	0	0	0	0	0	0	0	0	3	0	0	0
b16937 NZ_ADBE01000059 Neisseria polysaccharea ATCC 43768	Proteobacteria	Neisseria polysaccharea	25	0.00924953	2	0	0	0	0	0	0	0	0	0	0	0	0	0	3	0	0	0	0	0	0	0	0	0	0	0	0	0	0	0	22	0	0	0	0	0	0	0	0	0	0	0	0	0	0
b13518 ACEA01000043 Eikenella corrodens ATCC 23834	Proteobacteria	Eikenella corrodens	24	0.00887955	2	0	0	0	0	0	7	0	0	0	0	0	0	0	0	0	0	0	17	0	0	0	0	0	0	0	0	0	0	0	0	0	0	0	0	0	0	0	0	0	0	0	0	0	0
b13617 NC_013440 Haliangium ochraceum DSM 14365	Proteobacteria	Unknown Proteobacteria	23	0.00850957	2	0	0	0	0	0	0	0	0	0	0	0	0	0	0	0	0	0	0	0	0	0	22	0	0	0	0	0	0	0	0	0	0	0	0	0	0	0	0	0	0	1	0	0	0
b15671 NZ_GG704964 Acinetobacter johnsonii SH046	Proteobacteria	Acinetobacter johnsonii	22	0.00813959	2	0	0	0	0	0	0	0	0	0	0	0	0	0	0	0	0	0	0	0	0	0	0	0	0	0	0	0	0	0	0	0	0	0	0	0	0	0	0	0	0	0	0	0	0
b15852 FJ860274 Ultramicrobacterium sp. MY14 NBRC 102665	Proteobacteria	Ultramicrobacterium sp.	21	0.00776961	2	0	0	0	0	0	0	0	0	0	0	0	0	0	0	0	0	0	0	0	0	0	0	0	0	0	0	3	18	0	0	0	0	0	0	0	0	0	0	0	0	0	0	0	0
b19073 NZ_AEMI01000016 Leuconostoc gelidum KCTC 3527	Firmicutes	Leuconostoc gelidum	20	0.00739962	2	0	0	0	0	0	0	0	0	0	0	0	0	0	0	0	0	0	0	0	0	0	0	0	1	0	0	0	0	0	0	0	0	0	0	0	0	0	0	0	0	0	0	0	0
b10203 EF571586 Acidaminococcus fermentans ATCC 25085	Firmicutes	Unknown Firmicutes	18	0.00665966	2	0	0	0	0	0	0	0	16	0	0	0	0	0	0	0	0	0	0	0	0	0	2	0	0	0	0	0	0	0	0	0	0	0	0	0	0	0	0	0	0	0	0	0	0
v3821 3576 Corynebacterium simulans A3M21	Actinobacteria	Corynebacterium simulans	18	0.00665966	2	0	0	0	0	17	0	0	0	0	0	0	0	0	0	0	0	0	0	0	0	0	0	0	0	0	0	0	0	0	0	0	0	0	0	0	0	0	0	0	0	0	0	0	0
b278 AF240566 Bifidobacterium breve JCM1192	Actinobacteria	Bifidobacterium breve	17	0.00628968	2	0	0	0	0	0	0	0	0	0	0	0	0	14	0	3	0	0	0	0	0	0	0	0	0	0	0	0	0	0	0	0	0	0	0	0	0	0	0	0	0	0	0	0	0
b18953 NC_015500 Treponema brennaborense DSM 12168	Other bacteria	Unknown Bacteria	17	0.00628968	2	0	0	0	0	0	0	0	13	0	0	0	0	0	0	0	0	0	4	0	0	0	0	0	0	0	0	0	0	0	0	0	0	0	0	0	0	0	0	0	0	0	0	0	0
b11953 NC_012803 Micrococcus luteus NCTC 2665	Actinobacteria	Unknown Actinobacteria	16	0.0059197	2	0	0	0	0	0	0	0	0	0	0	0	0	0	0	0	0	0	0	0	0	0	0	0	0	0	0	0	0	0	0	0	0	0	0	0	0	0	0	0	0	14	2	0	0
b19041 CP002727 Pseudomonas fulva 12-X	Proteobacteria	Pseudomonas fulva	15	0.00554972	2	0	0	0	0	0	0	0	0	0	0	0	0	0	0	0	0	0	0	0	0	0	0	0	0	2	0	0	13	0	0	0	0	0	0	0	0	0	0	0	0	0	0	0	0
b6846 AY691285 Prevotella oralis ATCC 33269	Bacteroidetes	Prevotella oralis	14	0.00517974	2	0	0	0	0	0	0	0	0	0	0	0	0	0	0	0	0	0	0	0	0	0	0	0	0	0	0	0	0	0	0	0	0	0	0	0	0	0	0	0	0	0	0	0	0
b20763 ACWJ01000002 Campylobacter sp. 10_1_50	Proteobacteria	Campylobacter sp.	13	0.00480976	2	0	0	0	0	0	1	0	0	0	0	0	0	0	0	0	0	0	0	0	0	0	0	0	0	0	0	0	0	0	0	0	0	0	0	0	0	0	0	0	0	0	0	0	0
b12705 NZ_ABZV01000014 Capnocytophaga sputigena Capno	Bacteroidetes	Capnocytophaga sputigena	13	0.00480976	2	0	0	0	0	0	11	0	0	0	0	0	0	0	0	0	0	0	0	0	0	0	0	0	0	0	0	0	0	0	0	0	0	0	0	0	0	0	0	0	0	0	0	0	0
b6876 NZ_AAFQ01000002 Polaromonas sp. JS666	Proteobacteria	Polaromonas sp.	10	0.00369981	2	0	0	0	8	0	0	0	0	0	0	0	0	0	0	0	0	0	0	0	0	0	0	0	0	0	0	0	0	0	0	0	0	0	0	0	0	0	0	0	0	0	0	0	0
b1456 AF242278 Staphylococcus auricularis ATCC 33753	Firmicutes	Staphylococcus auricularis	9	0.00332983	2	0	0	0	0	0	0	0	0	0	0	0	0	0	0	0	0	0	0	0	1	0	0	0	0	0	0	0	0	0	0	0	8	0	0	0	0	0	0	0	0	0	0	0	0
b17625 AB547598 Prevotella copri JCM 13464	Bacteroidetes	Unknown Bacteroidetes	8	0.00295985	2	0	0	0	0	0	0	0	0	0	0	0	0	0	0	0	0	0	6	0	0	0	0	0	0	0	0	0	0	0	0	0	0	0	0	0	0	0	0	0	0	0	0	0	0
b10204 DQ914835 Sphingobacterium multivorum LMG8342	Bacteroidetes	Sphingobacterium multivorum	8	0.00295985	2	0	0	0	0	0	0	0	0	0	0	0	0	0	1	0	0	0	0	7	0	0	0	0	0	0	0	0	0	0	0	0	0	0	0	0	0	0	0	0	0	0	0	0	0
b18377 CP002444 Thermovibrio ammonificans HB-1	Other bacteria	Unknown Bacteria	8	0.00295985	2	0	0	0	0	0	5	0	0	0	0	0	0	0	0	0	0	0	3	0	0	0	0	0	0	0	0	0	0	0	0	0	0	0	0	0	0	0	0	0	0	0	0	0	0
b13663 ACGC01000118 Anaerococcus tetradius ATCC 35098	Firmicutes	Anaerococcus tetradius	7	0.00258987	2	0	0	0	0	0	0	0	0	0	0	0	0	0	0	0	0	0	0	0	0	0	0	0	0	0	0	0	0	0	0	0	2	0	0	0	0	0	0	0	5	0	0	0	0
b17593 AEQO01000086 Prevotella salivae JCM 12084	Bacteroidetes	Prevotella salivae	7	0.00258987	2	0	0	0	0	0	4	0	0	0	0	0	0	0	0	0	0	0	3	0	0	0	0	0	0	0	0	0	0	0	0	0	0	0	0	0	0	0	0	0	0	0	0	0	0
b3354 AY123669 Acinetobacter baumannii ATCC 19606	Proteobacteria	Acinetobacter baumannii	6	0.00221989	2	0	0	0	0	0	0	0	0	0	0	0	0	0	0	0	0	0	0	0	0	0	0	0	0	0	0	0	0	0	0	0	0	0	0	0	0	0	0	0	0	0	0	0	0
b412 AB008147 Klebsiella oxytoca JCM1665	Proteobacteria	Klebsiella oxytoca	6	0.00221989	2	0	0	0	0	0	0	0	0	0	0	0	0	0	0	0	0	0	0	0	0	0	0	0	0	0	0	0	0	0	0	0	0	0	0	0	0	0	0	0	0	0	0	0	0
b17930 ADGQ01000035 Peptostreptococcus stomatis DSM 17678	Firmicutes	Peptostreptococcus stomatis	6	0.00221989	2	0	0	0	0	0	2	0	0	0	0	0	0	0	0	0	0	0	4	0	0	0	0	0	0	0	0	0	0	0	0	0	0	0	0	0	0	0	0	0	0	0	0	0	0
b5004 NC_002967 Treponema denticola ATCC 35405	Other bacteria	Treponema denticola	6	0.00221989	2	0	0	0	0	0	0	0	0	0	0	0	0	0	0	0	0	0	0	0	0	0	0	0	0	0	0	0	0	0	0	0	0	0	0	0	0	0	0	0	0	0	0	0	0
v3485 3421 Dermabacter hominis z357-1	Actinobacteria	Dermabacter hominis	5	0.00184991	2	0	0	0	0	0	0	0	0	0	0	0	0	0	0	0	0	0	0	0	0	0	0	0	0	0	0	0	3	0	0	0	0	0	0	0	0	0	0	0	0	0	2	0	0
b21062 AGZD01000007 Facklamia hominis CCUG 36813	Firmicutes	Facklamia hominis	5	0.00184991	2	0	0	0	0	0	0	0	0	0	0	0	0	0	0	0	0	0	0	0	3	0	0	0	2	0	0	0	0	0	0	0	0	0	0	0	0	0	0	0	0	0	0	0	0
v3116 3327 Haemophilus aphrophilus A1-69	Proteobacteria	Haemophilus aphrophilus	4	0.00147992	2	0	0	0	0	0	0	0	0	0	2	0	0	0	0	0	0	0	0	0	0	0	0	0	0	0	0	0	0	0	0	0	0	0	0	0	0	0	0	0	0	2	0	0	0
b21063 AGYA01000033 Bergeyella zoohelcum ATCC 43767	Bacteroidetes	Bergeyella zoohelcum	3	0.00110994	2	0	0	0	0	0	1	0	0	0	0	0	0	0	0	0	0	0	0	0	0	0	0	0	0	0	0	0	0	0	0	0	0	0	0	0	0	0	0	0	0	0	0	0	0
b20465 AP012337 Caldilinea aerophila DSM 14535	Other bacteria	Caldilinea aerophila	3	0.00110994	2	0	0	0	0	0	0	0	0	1	2	0	0	0	0	0	0	0	0	0	0	0	0	0	0	0	0	0	0	0	0	0	0	0	0	0	0	0	0	0	0	0	0	0	0
b20207 AGCJ01000042 Anaeroglobus geminatus F0357	Firmicutes	Anaeroglobus geminatus	101	0.0373681	1	0	0	0	0	0	0	0	0	0	0	0	0	0	0	0	0	0	0	0	0	0	0	0	0	0	0	0	0	0	0	0	0	0	0	0	0	0	0	0	0	0	0	0	0
b20420 NZ_AGRK01000030 Haemophilus sp. oral taxon 851 str. F0397	Proteobacteria	Haemophilus sp.	73	0.0270086	1	0	0	0	0	0	73	0	0	0	0	0	0	0	0	0	0	0	0	0	0	0	0	0	0	0	0	0	0	0	0	0	0	0	0	0	0	0	0	0	0	0	0	0	0
b19110 NC_015580 Novosphingobium sp. PP1Y	Proteobacteria	Novosphingobium sp.	63	0.0233088	1	0	0	0	0	0	0	0	63	0	0	0	0	0	0	0	0	0	0	0	0	0	0	0	0	0	0	0	0	0	0	0	0	0	0	0	0	0	0	0	0	0	0	0	0
b16676 ACKT01000016 Selenomonas noxia ATCC 43541	Firmicutes	Selenomonas noxia	51	0.018869	1	0	0	0	0	0	0	0	0	0	0	0	0	0	0	0	0	0	0	0	0	0	0	0	0	0	0	0	0	0	0	0	0	0	0	0	0	0	0	0	0	0	0	0	0
b3408 AY123666 Moraxella osloensis ATCC 19976	Proteobacteria	Moraxella osloensis	46	0.0170191	1	0	0	0	0	0	46	0	0	0	0	0	0	0	0	0	0	0	0	0	0	0	0	0	0	0	0	0	0	0	0	0	0	0	0	0	0	0	0	0	0	0	0	0	0
b6878 AADS00000000 Phanerochaete chrysosporium RP-78	Fungi	Phanerochaete chrysosporium	31	0.0114694	1	0	0	0	0	0	0	0	0	0	0	0	0	0	0	0	0	0	0	0	0	0	0	31	0	0	0	0	0	0	0	0	0	0	0	0	0	0	0	0	0	0	0	0	0
b10201 EF571588 Propionibacterium freudenreichii subsp. freudenreichii ATCC 6207	Actinobacteria	Propionibacterium freudenreichii	30	0.0110994	1	0	0	0	0	0	0	0	0	0	0	0	0	0	0	0	0	0	0	0	30	0	0	0	0	0	0	0	0	0	0	0	0	0	0	0	0	0	0	0	0	0	0	0	0
b18044 HM103922 Gemella sanguinis ATCC 700632	Firmicutes	Gemella sanguinis	23	0.00850957	1	0	0	0	0	0	0	0	0	0	0	0	0	0	0	0	0	0	0	0	0	0	0	0	0	0	0	0	0	0	0	0	0	0	0	0	0	0	0	0	0	0	0	0	0
b865 AY004274 Bifidobacterium pseudocatenulatum JCM1200	Actinobacteria	Bifidobacterium pseudocatenulatum	20	0.00739962	1	0	0	0	0	0	0	0	0	0	0	0	0	0	0	0	0	0	0	0	0	0	0	0	0	0	0	0	0	0	0	0	0	0	0	0	0	0	0	0	0	0	0	0	0
b5843 AY691313 Eubacterium dolichum ATCC 29143	Firmicutes	Eubacterium dolichum	18	0.00665966	1	0	0	0	0	0	0	0	0	0	0	0	0	0	0	0	0	0	0	0	0	0	0	0	0	0	0	0	0	0	0	0	0	0	0	0	0	0	0	0	0	0	0	0	0
b22878 AKIG01000002 Mycobacterium sp. H4Y	Actinobacteria	Unknown Actinobacteria	16	0.0059197	1	0	0	0	0	0	0	0	0	0	0	0	0	0	0	0	0	0	0	0	16	0	0	0	0	0	0	0	0	0	0	0	0	0	0	0	0	0	0	0	0	0	0	0	0
b17552 CP002116 Spirochaeta smaragdinae DSM 11293	Other bacteria	Unknown Bacteria	13	0.00480976	1	0	0	0	0	0	0	0	0	0	0	0	0	0	0	0	0	0	0	0	0	0	0	0	0	0	0	0	0	0	0	0	0	0	0	0	0	0	0	0	0	0	0	0	0
b13693 CP001629 Desulfomicrobium baculatum DSM 4028	Proteobacteria	Desulfomicrobium baculatum	12	0.00443977	1	0	0	0	0	0	0	0	0	0	0	0	0	0	0	0	0	0	0	0	0	0	0	0	0	0	0	0	0	0	0	0	0	0	0	0	0	0	12	0	0	0	0	0	0
b14627 NZ_ACYI01000002 Enhydrobacter aerosaccus SK60	Proteobacteria	Enhydrobacter aerosaccus	12	0.00443977	1	0	0	0	0	0	0	0	0	0	0	0	0	12	0	0	0	0	0	0	0	0	0	0	0	0	0	0	0	0	0	0	0	0	0	0	0	0	0	0	0	0	0	0	0
b18723 CP002585 Pseudomonas brassicacearum subsp. brassicacearum NFM421 CFBP 11874	Proteobacteria	Pseudomonas brassicacearum	12	0.00443977	1	0	0	0	0	0	0	0	0	0	0	0	0	0	0	0	0	0	0	0	0	0	0	0	0	0	0	0	12	0	0	0	0	0	0	0	0	0	0	0	0	0	0	0	0
b17634 AB547589 Porphyromonas uenonis JCM 13868	Bacteroidetes	Porphyromonas uenonis	11	0.00406979	1	0	0	0	0	0	0	0	0	0	0	0	0	0	0	0	0	0	0	0	0	0	0	0	0	0	0	0	0	0	0	0	0	0	0	0	0	0	0	0	0	0	0	0	0
b6839 AY691278 Prevotella buccalis ATCC 35310	Bacteroidetes	Prevotella buccalis	11	0.00406979	1	0	0	0	0	0	0	0	0	0	0	0	0	0	0	0	0	0	0	0	0	0	0	0	0	0	0	0	0	0	0	0	0	0	0	0	0	0	0	0	0	0	11	0	0
v4673 3908 Streptococcus sobrinus ATCC 33478	Firmicutes	Streptococcus sobrinus	11	0.00406979	1	0	0	0	0	0	0	0	0	0	0	0	0	0	0	0	0	0	0	0	0	0	0	0	0	0	0	0	0	0	0	0	0	0	0	0	0	0	0	0	0	0	0	0	0
b859 AY004280 Bifidobacterium bifidum JCM1255	Actinobacteria	Bifidobacterium bifidum	9	0.00332983	1	0	0	0	0	0	0	0	0	0	0	0	0	0	0	0	0	0	0	0	0	0	0	9	0	0	0	0	0	0	0	0	0	0	0	0	0	0	0	0	0	0	0	0	0
b13689 CP001682 Cryptobacterium curtum DSM 15641	Actinobacteria	Cryptobacterium curtum	9	0.00332983	1	0	0	0	0	0	0	0	0	0	0	0	0	0	0	0	0	0	0	0	0	0	0	0	0	0	0	0	0	0	0	0	0	0	0	0	0	0	0	0	0	0	0	0	0
b277 AF240565 Parascardovia denticolens DSM 10105	Actinobacteria	Parascardovia denticolens	9	0.00332983	1	0	0	0	0	0	0	0	0	0	0	0	0	0	0	0	0	0	0	0	0	0	0	0	0	0	0	0	0	0	0	0	0	0	0	0	0	0	0	0	0	0	0	0	0
b1432 AY608421 Lactobacillus jensenii ATCC 25258	Firmicutes	Lactobacillus jensenii	7	0.00258987	1	0	0	0	0	0	0	0	0	0	0	0	0	0	0	0	0	0	0	0	0	0	0	0	0	0	0	0	7	0	0	0	0	0	0	0	0	0	0	0	0	0	0	0	0
b7402 AY835628 Lactobacillus salivarius subsp. salicinius ATCC 11742	Firmicutes	Lactobacillus salivarius	7	0.00258987	1	0	0	0	0	0	0	0	0	0	0	0	0	0	0	0	0	0	0	0	0	0	0	0	0	0	0	0	0	0	0	0	7	0	0	0	0	0	0	0	0	0	0	0	0
b19135 NZ_AFII01000001 Parvimonas sp. oral taxon 110 str. F0139	Firmicutes	Unknown Firmicutes	7	0.00258987	1	0	0	0	0	0	0	0	0	0	0	0	0	0	0	0	0	0	0	0	0	0	0	0	0	0	0	0	0	0	0	0	0	0	0	0	0	0	0	0	0	0	0	0	0
b21893 AGZU01000014 Sphingobium yanoikuyae ATCC 51230	Proteobacteria	Sphingobium yanoikuyae	7	0.00258987	1	0	0	0	0	0	0	0	0	0	0	0	0	7	0	0	0	0	0	0	0	0	0	0	0	0	0	0	0	0	0	0	0	0	0	0	0	0	0	0	0	0	0	0	0
v3139 3380 Brevibacterium sp. z233	Actinobacteria	Brevibacterium sp.	6	0.00221989	1	0	0	0	0	0	0	0	0	0	0	0	0	0	0	0	0	0	0	0	0	0	0	0	0	0	0	0	0	0	0	0	6	0	0	0	0	0	0	0	0	0	0	0	0
b12081 AP009380 Porphyromonas gingivalis ATCC 33277	Bacteroidetes	Unknown Bacteroidetes	5	0.00184991	1	0	0	0	0	0	0	0	0	0	0	0	0	0	0	0	0	0	0	0	5	0	0	0	0	0	0	0	0	0	0	0	0	0	0	0	0	0	0	0	0	0	0	0	0
b19158 NC_015671 Cellvibrio gilvus ATCC 13127	Proteobacteria	Unknown Proteobacteria	4	0.00147992	1	0	0	0	0	0	0	0	0	0	0	0	0	0	0	0	0	0	0	0	0	0	0	0	0	0	0	0	0	0	0	0	4	0	0	0	0	0	0	0	0	0	0	0	0
b19037 NZ_AFHT01000103 Desmospora sp. 8437	Firmicutes	Unknown Firmicutes	4	0.00147992	1	0	0	0	0	0	0	0	0	0	0	0	0	0	0	0	4	0	0	0	0	0	0	0	0	0	0	0	0	0	0	0	0	0	0	0	0	0	0	0	0	0	0	0	0
b411 AB008146 Klebsiella pneumoniae JCM1662	Proteobacteria	Klebsiella pneumoniae	4	0.00147992	1	0	0	0	0	0	0	0	0	0	0	0	0	0	0	0	0	0	0	0	0	0	0	0	0	0	0	0	0	0	0	0	0	0	0	0	0	0	0	4	0	0	0	0	0
b6820 AY691259 Lachnospira multipara ATCC 19207	Firmicutes	Lachnospira multipara	4	0.00147992	1	0	0	0	0	0	0	0	0	0	0	0	0	0	0	0	0	0	0	0	4	0	0	0	0	0	0	0	0	0	0	0	0	0	0	0	0	0	0	0	0	0	0	0	0
b17557 CP002106 Olsenella uli DSM 7084	Actinobacteria	Olsenella uli	4	0.00147992	1	0	0	0	0	0	0	0	0	0	0	0	0	0	0	0	0	0	0	0	0	0	0	0	0	0	0	0	0	0	0	0	0	0	0	0	0	0	0	0	0	0	0	0	0
b9553 NC_009439 Pseudomonas mendocina strain ymp	Proteobacteria	Pseudomonas mendocina	4	0.00147992	1	0	0	0	0	0	0	0	0	0	0	0	0	0	0	0	0	0	0	0	0	0	0	0	0	0	0	0	0	0	0	0	0	0	0	0	0	0	0	0	0	0	0	0	4
b413 AB008148 Klebsiella planticola JCM7251	Proteobacteria	Klebsiella planticola	3	0.00110994	1	0	0	0	0	0	0	0	0	0	0	0	0	0	0	0	0	0	0	0	0	0	0	0	0	0	0	0	0	0	0	0	0	3	0	0	0	0	0	0	0	0	0	0	0
v1450 bz_f Megasphaera cerevisiae ATCC 43254	Firmicutes	Megasphaera cerevisiae	3	0.00110994	1	0	0	0	0	0	0	0	0	0	0	0	0	0	0	0	0	0	0	0	3	0	0	0	0	0	0	0	0	0	0	0	0	0	0	0	0	0	0	0	0	0	0	0	0
b20081 NZ_AFIZ01000023 Corynebacterium nuruki S6-4	Actinobacteria	Corynebacterium nuruki	2	0.000739962	1	0	0	0	0	0	0	0	2	0	0	0	0	0	0	0	0	0	0	0	0	0	0	0	0	0	0	0	0	0	0	0	0	0	0	0	0	0	0	0	0	0	0	0	0
b16813 GQ251385 Streptococcus constellatus ATCC 27823	Firmicutes	Streptococcus constellatus	2	0.000739962	1	0	0	0	0	0	0	0	0	0	0	0	0	0	0	0	0	0	2	0	0	0	0	0	0	0	0	0	0	0	0	0	0	0	0	0	0	0	0	0	0	0	0	0	0
		Totals:	270284	100
[truncated: 21 more columns]
