# Supplementary material for: Characterization of the Upper Respiratory Tract Microbiomes of Patients with Pandemic H1N1 Influenza
Source: PLoS One. 2013 Jul 2;8(7):e69559. doi: 10.1371/journal.pone.0069559 (PMC3699515; doi:10.1371/journal.pone.0069559)
Supplement: Table S4 — ANOVA analysis of diversity statistics. (XLSX) [file pone.0069559.s004.xlsx]

## Sheet: Table S4
Table S4 - ANOVA results comparing diversity statistics for microbiomes based on nearest neighbour "species"
The values for the diversity indices were derived from the mean of 1000 iterations of a 100 read subsampling for each patient
Sample designation:
Index	Group	Mean	SD	Range	F	p
Shannon	non-STAT	2.13	1.04	0.08-3.66	0.111,63	0.73
	STAT	2.22	1.05	0.14-3.59
Simpson	non-STAT	0.6	0.26	0.02-0.88	0.061,63	0.8
	STAT	0.61	0.28	0.03-0.88
Chao1	non-STAT	16.45	7.29	2.46-30.14	1.591,63	0.21
	STAT	18.96	8.79	2.65-36.73
Observed # species	non-STAT	11.88	5.18	2.00-21.95	0.341,63	0.56
	STAT	12.63	14.29	2.48-20.84
Patient Gender:
Index	Group	Mean	SD	Range	F	p
Shannon	male	2.27	1.05	0.08-3.66	0.541,62	0.46
	female	2.08	1.04	0.14-3.59
Simpson	male	0.63	0.26	0.02-0.88	0.661,62	0.42
	female	0.58	0.28	0.03-0.87
Chao1	male	17.91	9	2.46-36.73	0.03,62	0.85
	female	17.53	7.34	3.35-29.51
Obs # species	male	12.43	5.38	2.00-21.95	0.041,62	0.84
	female	12.17	13.37	2.56-20.84
Patient Age group: Ages 0.01-0.50 & 0.51-3.00 were combined as well as 50.01-65.00 & >=65.01 compared to other analyses
Index	Group	Mean	SD	Range	F	p
Shannon	0.01-3.0 years	1.7	1.03	0.31-3.35	2.174,60	0.08
	3.01-9.0 years	1.94	1.1	0.14-3.66
	9.01-20.0 years	1.8	1.03	0.32-3.10
	20.01-50.0 years	2.6	0.98	0.57-3.59
	>=50.01 years	2.48	0.93	0.08-3.44
Simpson	0.01-3.0 years	0.5	0.27	0.09-0.88	1.964,60	0.11
	3.01-9.0 years	0.53	0.28	0.03-0.88
	9.01-20.0 years	0.51	0.28	0.08-0.83
	20.01-50.0 years	0.7	0.25	0.15-0.87
	>=50.01 years	0.69	0.24	0.02-0.88
Chao1	0.01-3.0 years	13.91	8.13	3.86-31.02	1.294,60	0.28
	3.01-9.0 years	18.28	9.14	3.35-30.14
	9.01-20.0 years	15.51	6.15	6.59-23.52
	20.01-50.0 years	19.9	6.65	9.73-29.51
	>=50.01 years	19.22	8.41	2.46-36.73
Obs # species	0.01-3.0 years	9.65	5.14	3.24-19.49	1.894,60	0.13
	3.01-9.0 years	12.03	6.08	2.56-21.95
	9.01-20.0 years	10.72	4.34	4.33-15.78
	20.01-50.0 years	14.37	4.22	6.32-20.84
	>=50.01 years	13.4	4.76	2.00-20.71
Health authority:
Index	Group	Mean	SD	Range	F	p
Shannon	Fraser	2.24	0.97	0.57-3.44	0.424,60	0.79
	Northern	2.4	1	0.32-3.35
	Vancouver Island	1.88	0.96	0.43-2.92
	Vancouver Coastal	2.27	1.04	0.50-3.49
	Interior	2.04	1.16	0.08-3.66
Simpson	Fraser	0.64	0.24	0.15-0.88	0.534,60	0.71
	Northern	0.67	0.25	0.08-0.88
	Vancouver Island	0.53	0.27	0.11-0.80
	Vancouver Coastal	0.63	0.27	0.13-0.88
	Interior	0.56	0.3	0.02-0.88
Chao1	Fraser	17.98	7.69	3.86-28.64	0.214,60	0.93
	Northern	17.94	7.86	6.77-31.58
	Vancouver Island	15.67	6.55	6.73-29.52
	Vancouver Coastal	19.05	8.04	7.28-36.73
	Interior	17.63	9.42	2.46-31.81
Obs # species	Fraser	12.16	5.08	3.24-18.63	0.204,60	0.93
	Northern	12.87	4.98	4.33-20.71
	Vancouver Island	10.98	3.99	4.76-16.96
	Vancouver Coastal	12.76	4.69	5.45-18.88
	Interior	12.06	6.03	2.00-21.95
Specimen type:
Index	Group	Mean	SD	Range	F	p
Shannon	Nasopharyngeal swab	2.18	0.98	0.14-3.44	0.552,61	0.58
	Nose swab	2.28	1.2	0.08-3.66
	Nasopharyngeal washing	1.88	0.91	0.43-3.35
Simpson	Nasopharyngeal swab	0.62	0.26	0.03-0.88	0.352,61	0.71
	Nose swab	0.61	0.3	0.02-0.88
	Nasopharyngeal washing	0.54	0.24	0.11-0.86
Chao1	Nasopharyngeal swab	17.16	7.43	3.35-31.81	0.192,61	0.83
	Nose swab	18.31	9.35	2.46-36.73
	Nasopharyngeal washing	16.71	7.31	6.73-31.02
Obs # species	Nasopharyngeal swab	12.07	4.75	2.56-18.63	0.522,61	0.6
	Nose swab	12.96	5.97	2.00-21.95
	Nasopharyngeal washing	11.05	4.44	4.76-19.49
